# Supplementary material for: Investigation of Anti-Tumor Effects of an MLK1 Inhibitor in Prostate and Pancreatic Cancers
Source: MDPI journal article supplement (doi:10.3390/biology10080742), 2021-08-02

# Original images for Western blotting

Article

Investigation of anti-tumor effects of an MLK1 inhibitor in prostate and pancreatic cancers

Yu-Ching Fan, Kai-Chen Hsu, Tony Eight Lin, Dietmar Zechner, Yuan-Chin Tsai

Gels in Figure 3B

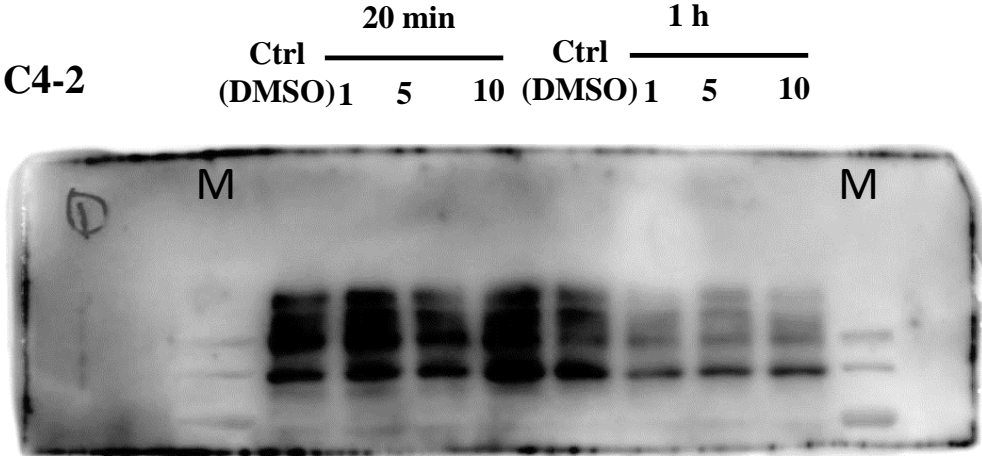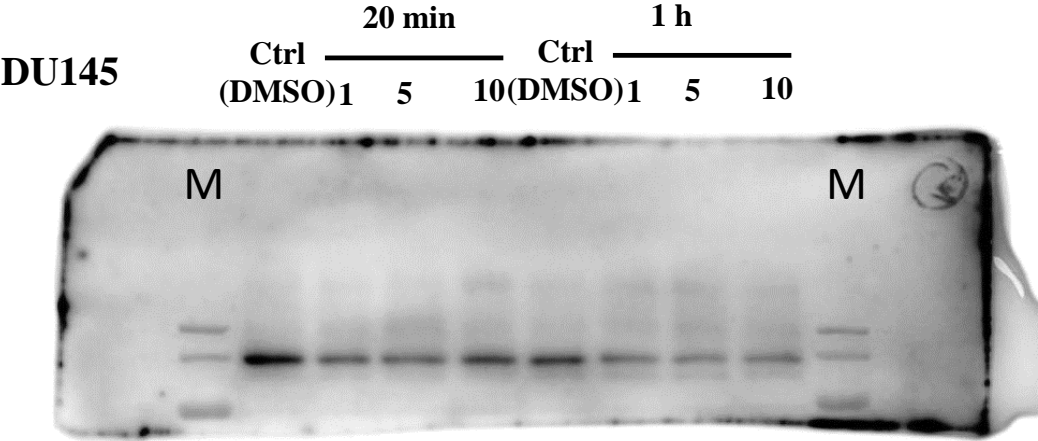

P-MLK1

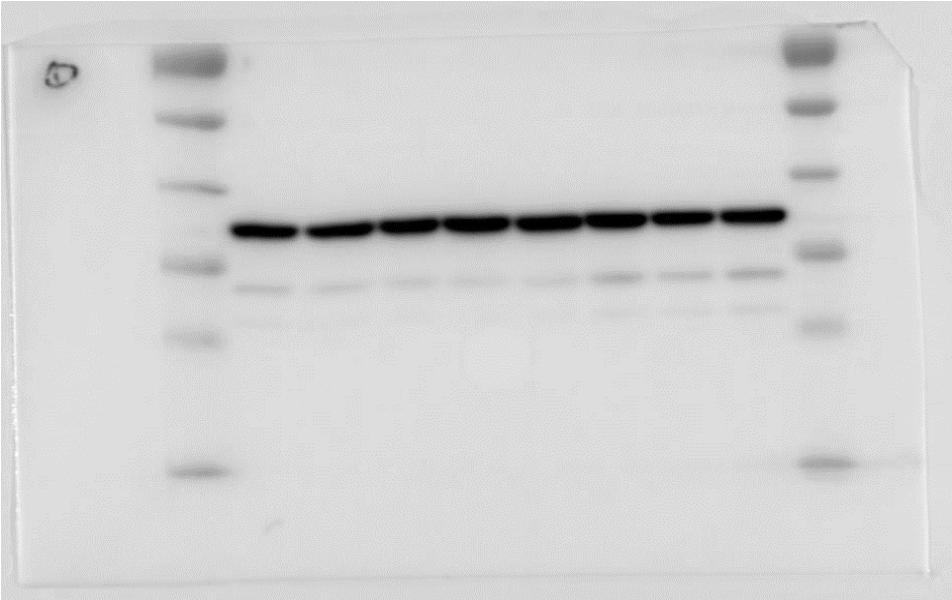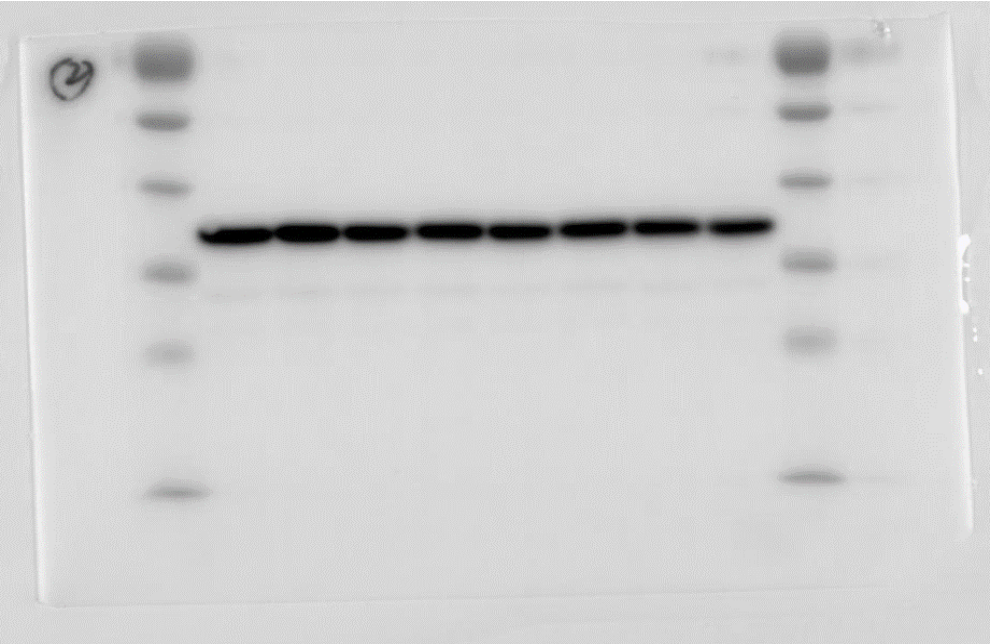

GAPDH

Gels in Figure 3C

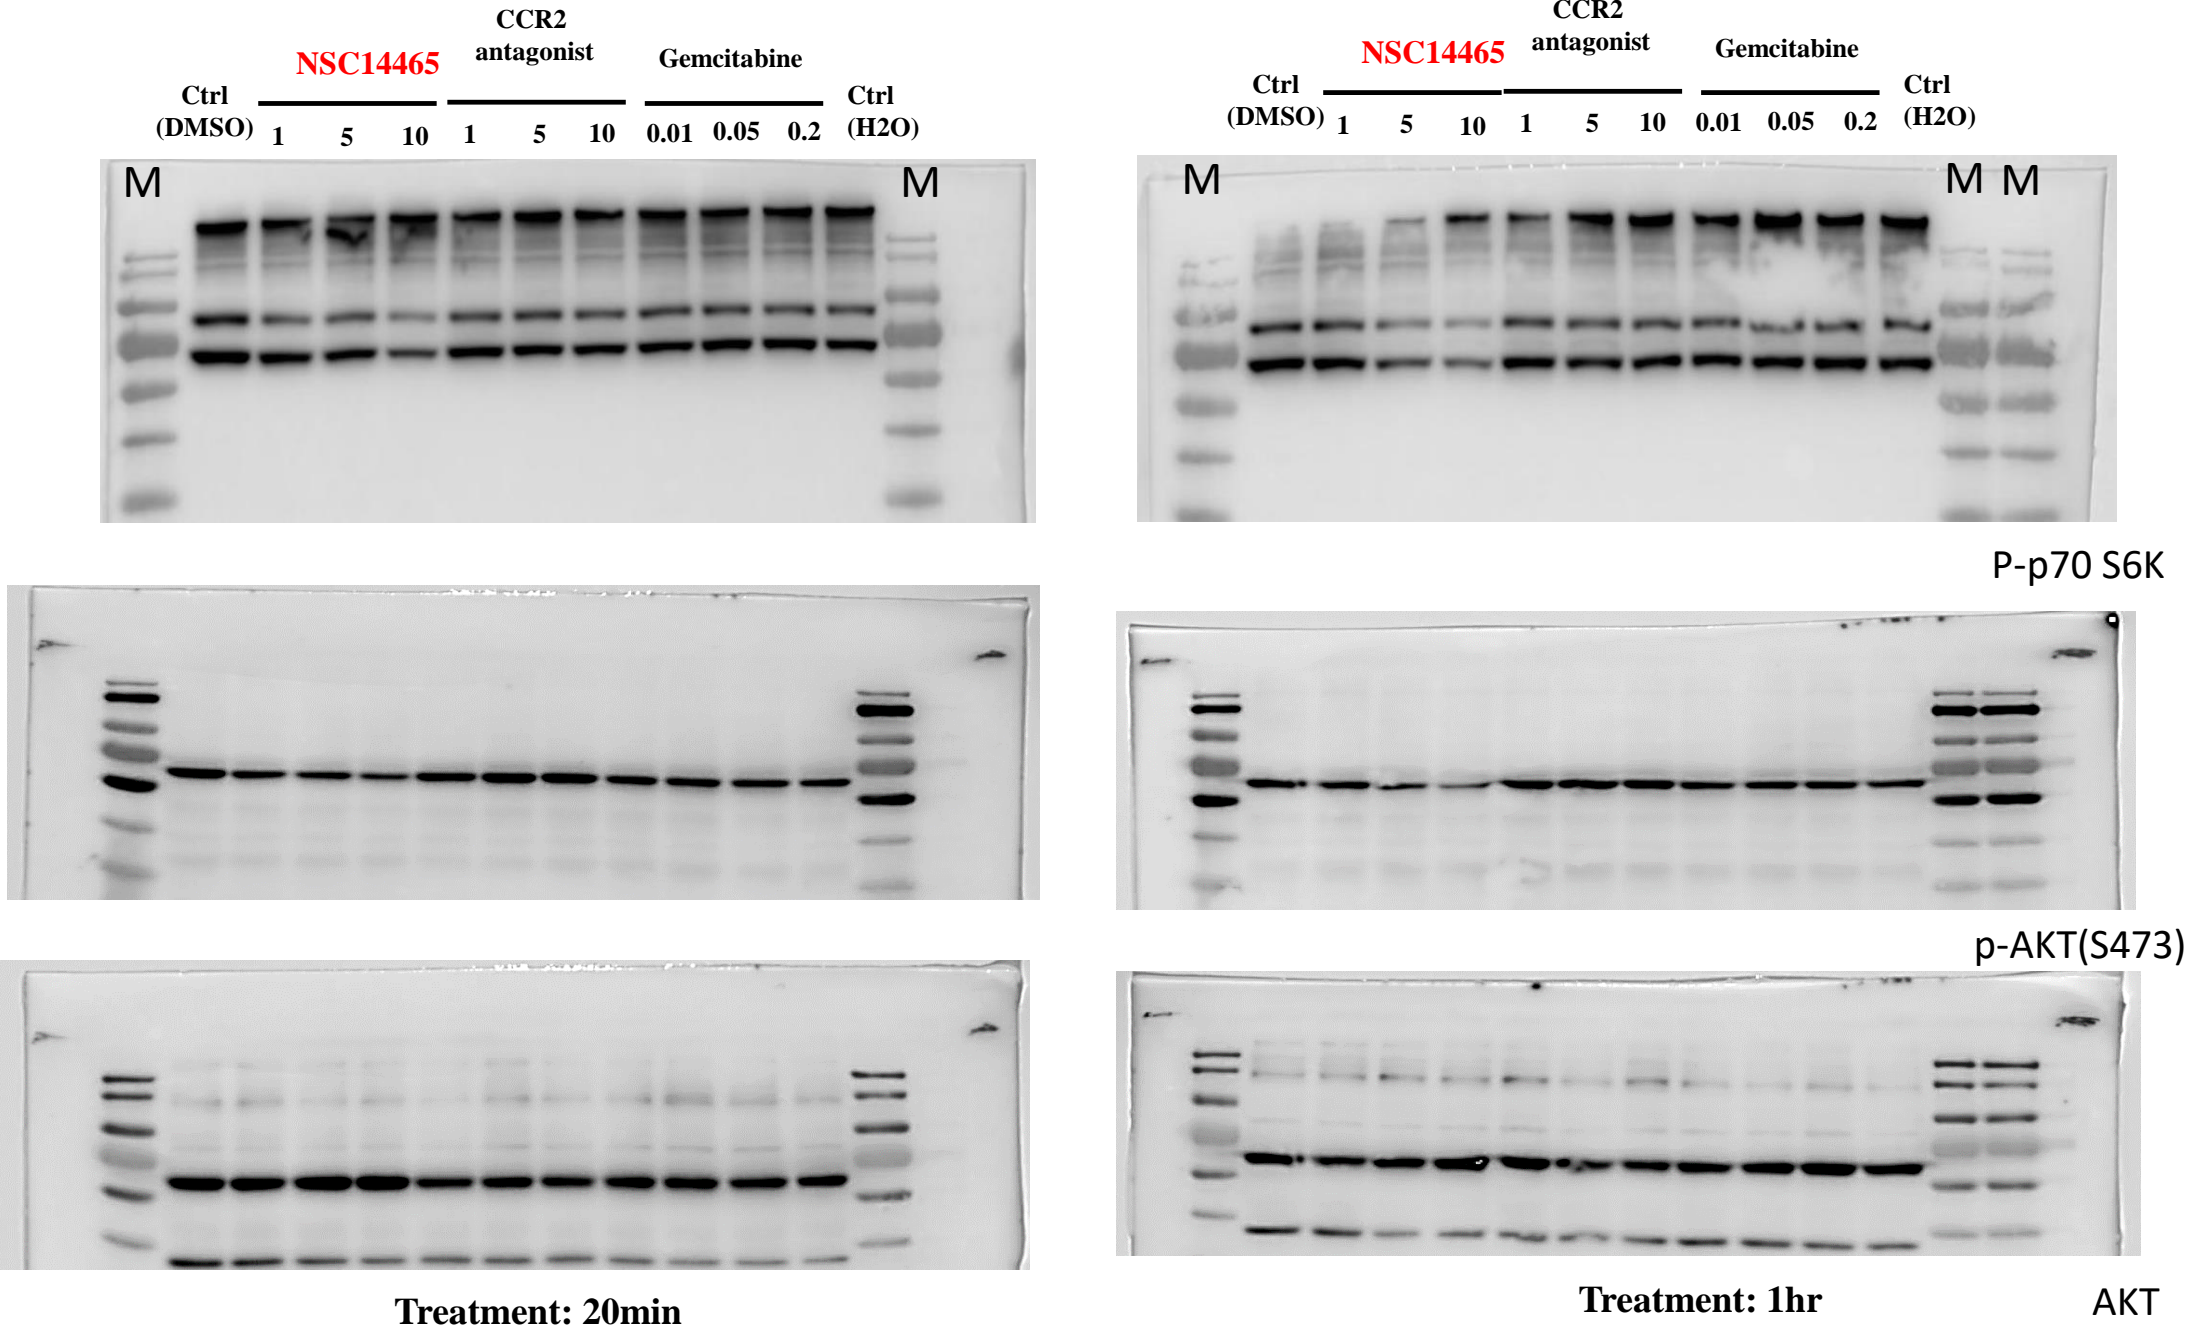



Gels in Figure 3C

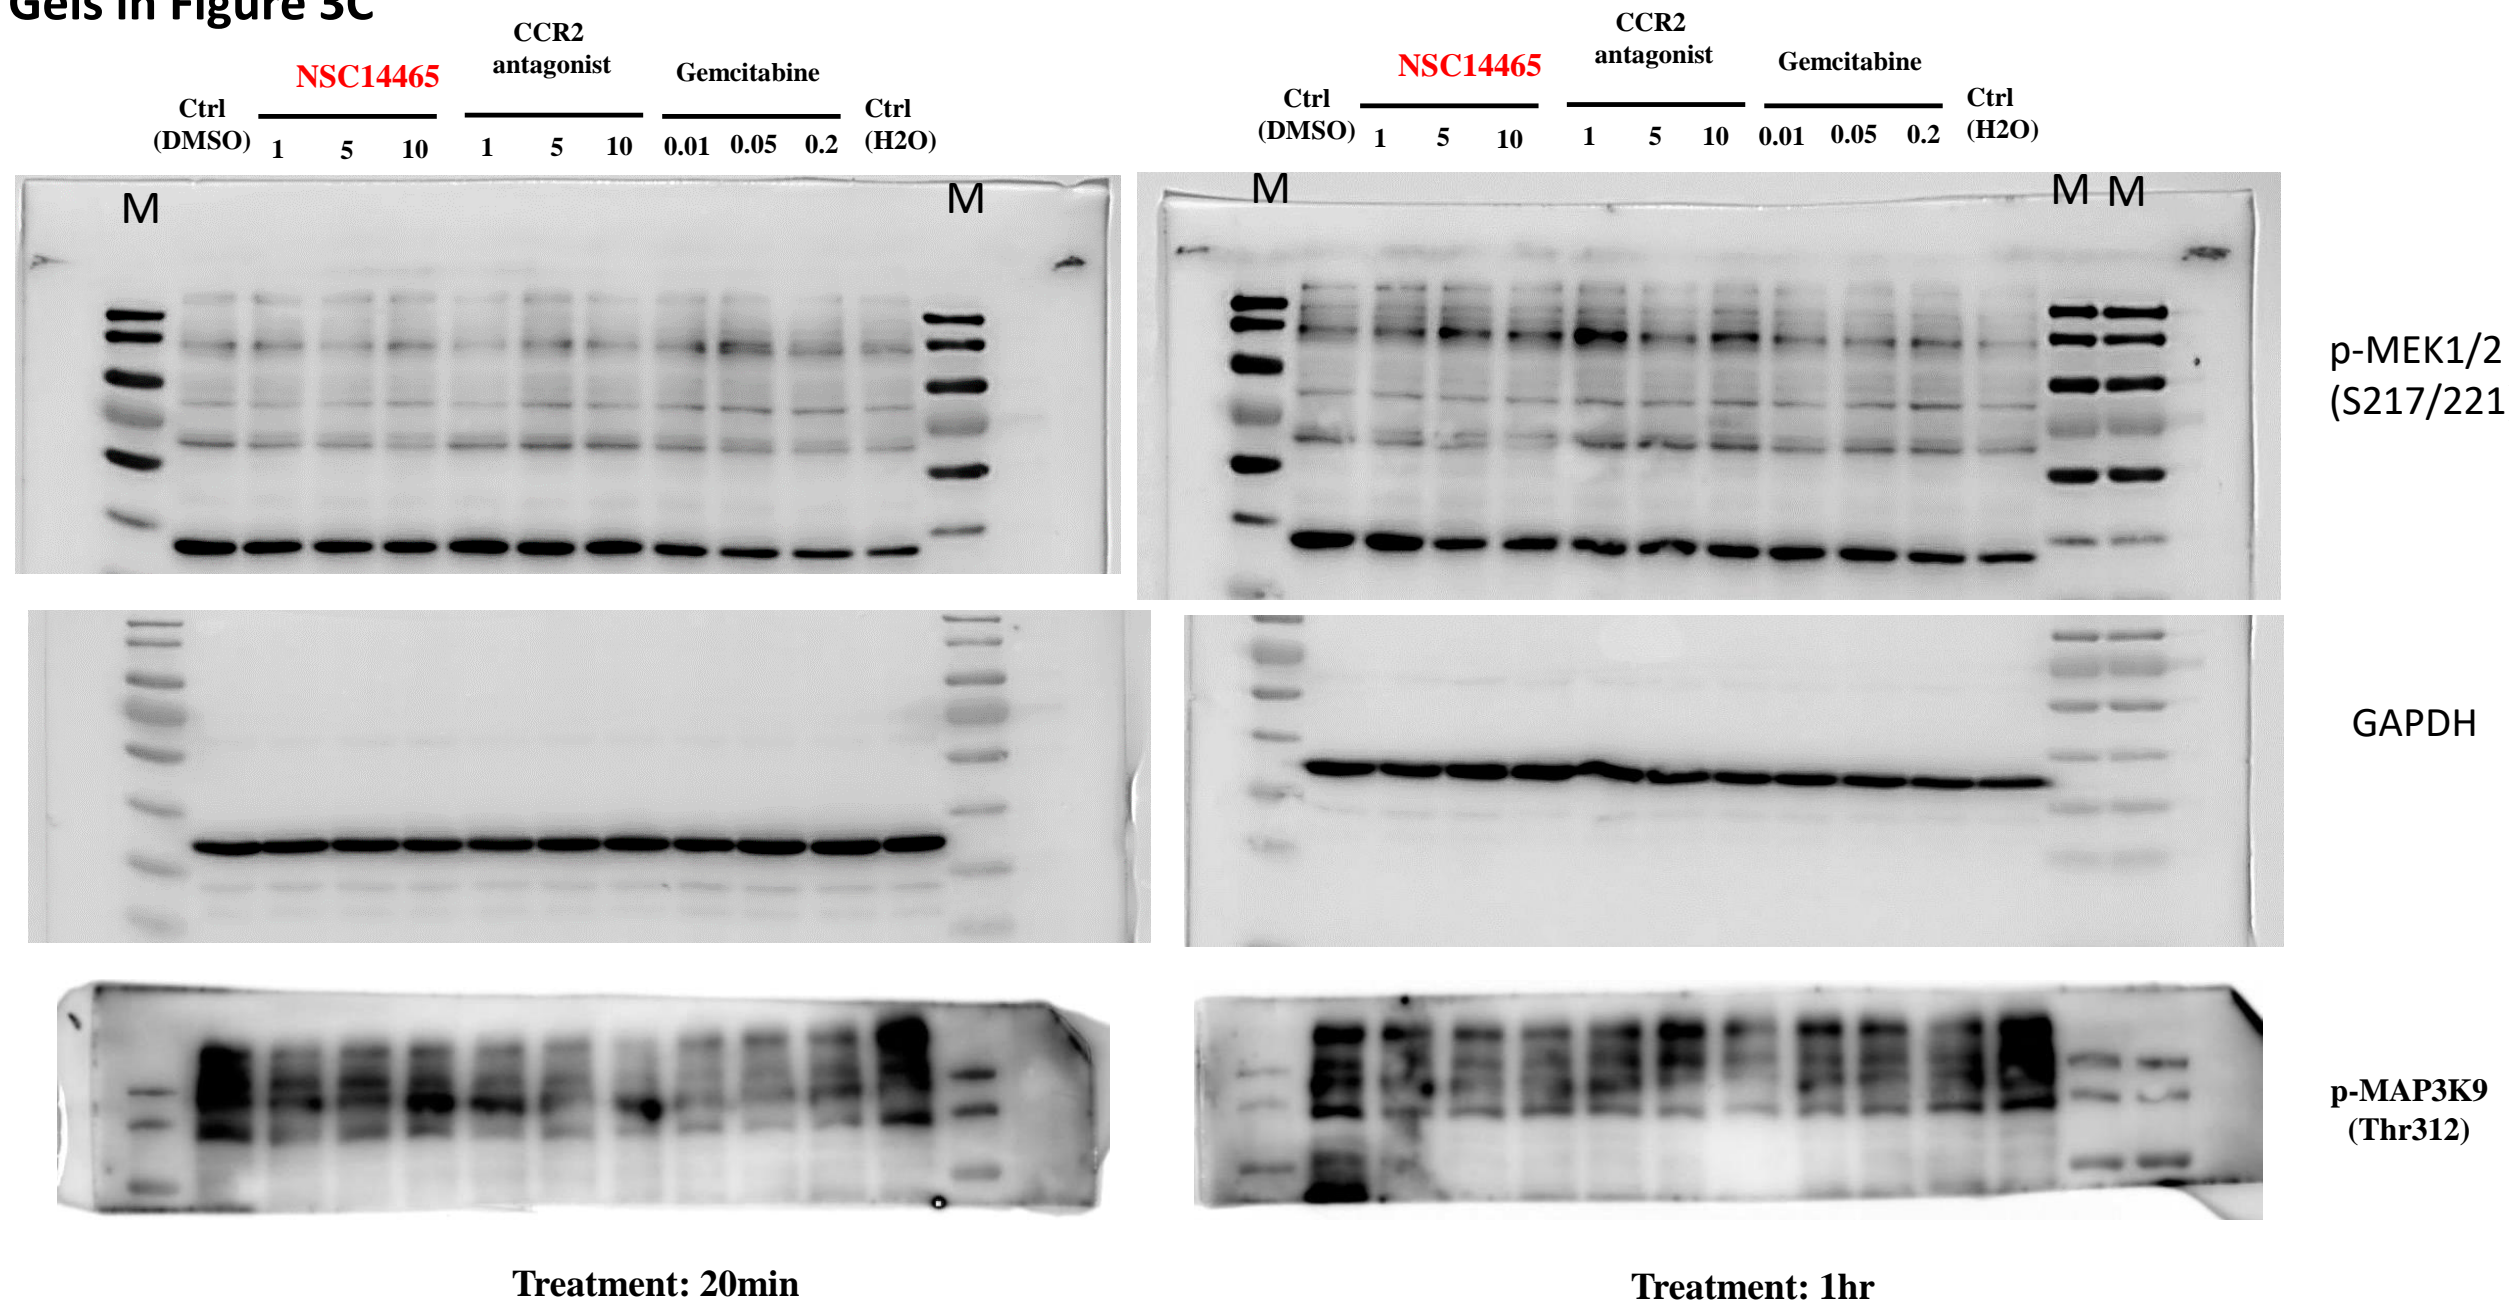

C4-2/  
MAP3K9

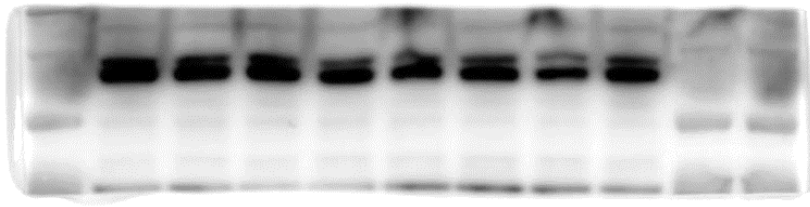

DU145/  
MAP3K9

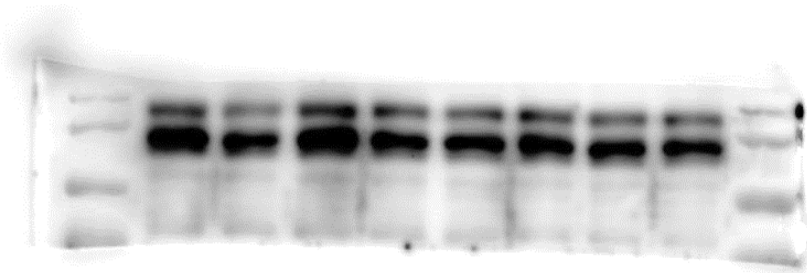

PC3/ MAP3K9

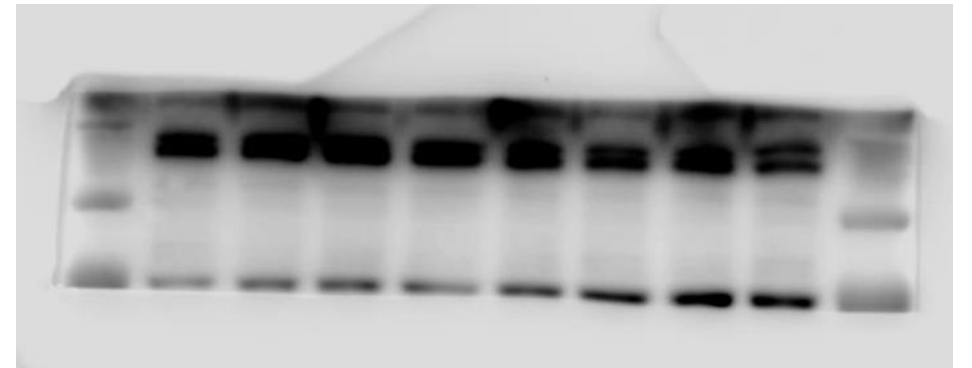

Supplement: s1 [file s1]
